# Supplementary material for: Pleural effusion post coronary artery bypass surgery: associations and complications
Source: PubMed Central journal article supplement — J Thorac Dis. 2021 Feb;13(2):1083–9. doi: 10.21037/jtd-20-2082 (PMC7947477; doi:10.21037/jtd-20-2082), 2021-02
Supplement: jtd-13-02-1083-dss.pdf [file jtd-13-02-1083-dss.pdf]

## Data Sharing Statement

|                     |                                                                                                                                                    |                                                                                                               |
|---------------------|----------------------------------------------------------------------------------------------------------------------------------------------------|---------------------------------------------------------------------------------------------------------------|
| <b>Article Info</b> | <a href="http://dx.doi.org/10.21037/jtd-20-2082">http://dx.doi.org/10.21037/jtd-20-2082</a> .                                                      |                                                                                                               |
| <b>Item</b>         | <b>Question</b>                                                                                                                                    | <b>Authors' Response</b><br>(place "-" if not applicable)                                                     |
| 1                   | Would you like to share data collected for your study to others?                                                                                   | The ethics approval obtained by the authors from our regional ethics committee does not include data sharing. |
| 2                   | If not, would you like to share the reason for your decision?                                                                                      | The ethics approval obtained by the authors from our regional ethics committee does not include data sharing. |
| 3                   | What data in particular will be shared?                                                                                                            | N/A                                                                                                           |
| 4                   | Any other documents will be share? Such as study protocol, statistical analysis plan, informed consent form, clinical study report, analytic code. | The authors would be happy to provide the study protocol.                                                     |
| 5                   | When will data availability begin?                                                                                                                 | From time of publication.                                                                                     |
| 6                   | When will data availability end?                                                                                                                   | N/A                                                                                                           |
| 7                   | To whom will you share the data?                                                                                                                   | Applying readers                                                                                              |
| 8                   | For what type of analysis or purpose?                                                                                                              | All                                                                                                           |
| 9                   | How or where can the data/documents be obtained?                                                                                                   | Contacting the corresponding author                                                                           |
| 10                  | Any other restrictions?                                                                                                                            | N/A                                                                                                           |
